# Supplementary material
Source: PubMed Central journal article supplement (PMC3092590)
Supplement: NIHMS282505-supplement-Supplementary_Figure.pdf [file NIHMS282505-supplement-Supplementary_Figure.pdf]

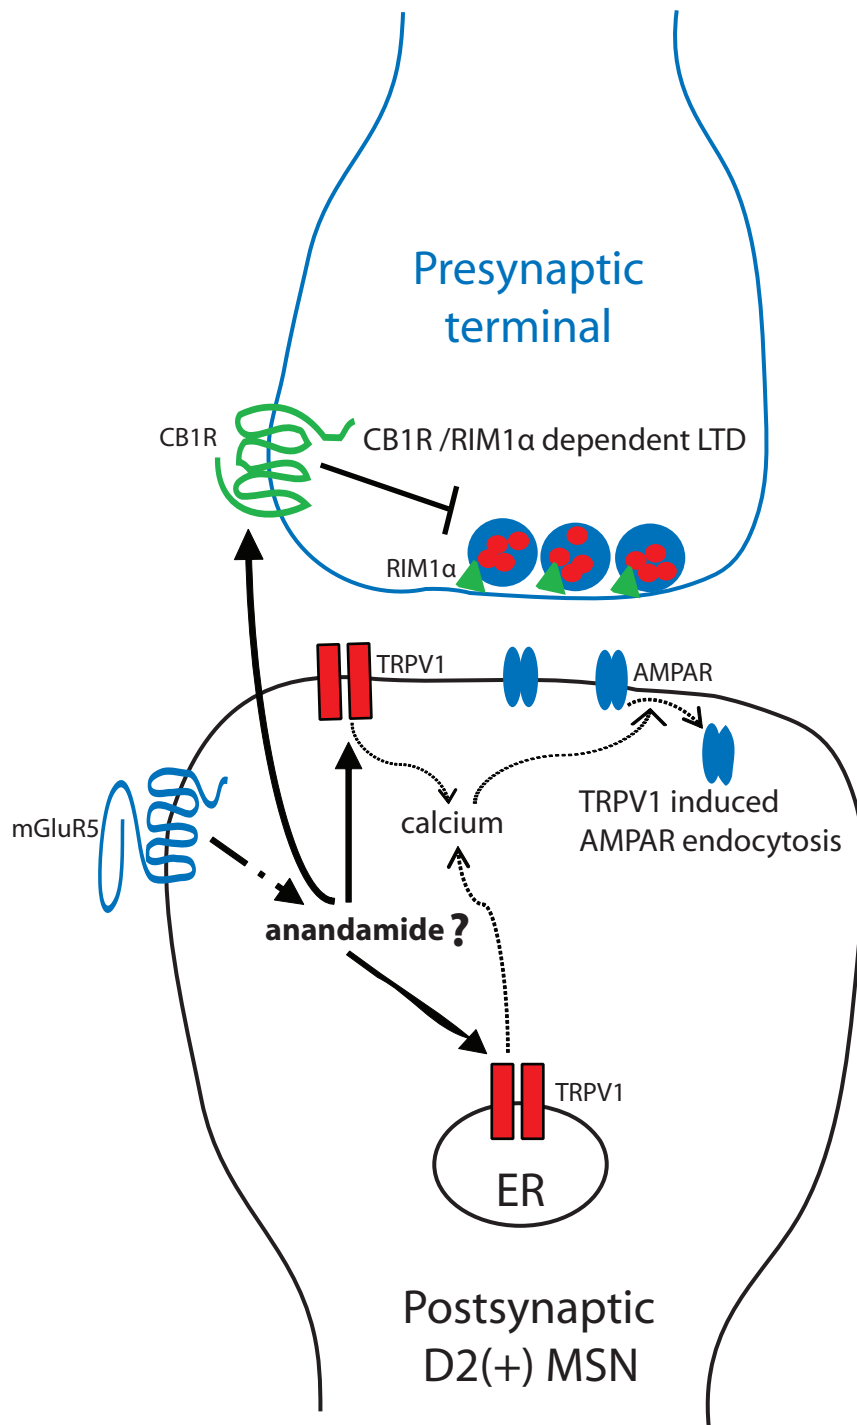

**Supplemental Figure 1.** Model of the two forms of LFS LTD in NAc core D2(+) MSNs. Activation of postsynaptic mGluR5 leads to production of anandamide, which functions as a retrograde messenger to activate presynaptic CB1 receptors and also simultaneously activates postsynaptic TRPV1 channels. Activation of presynaptic CB1 receptors leads to a long-lasting depression of glutamate release in a manner that requires the presynaptic active zone protein, RIM1 $\alpha$ . Activation of postsynaptic TRPV1 channels, localized in the ER and/or plasma membrane, causes a rise in intracellular calcium that triggers postsynaptic LTD by causing the endocytosis of synaptic AMPA receptors.
